# Supplementary material
Source: ML conference proceedings conference paper supplement (https://openreview.net/forum?id=bYP6YB84Pq)

Losses: Comparison of Models

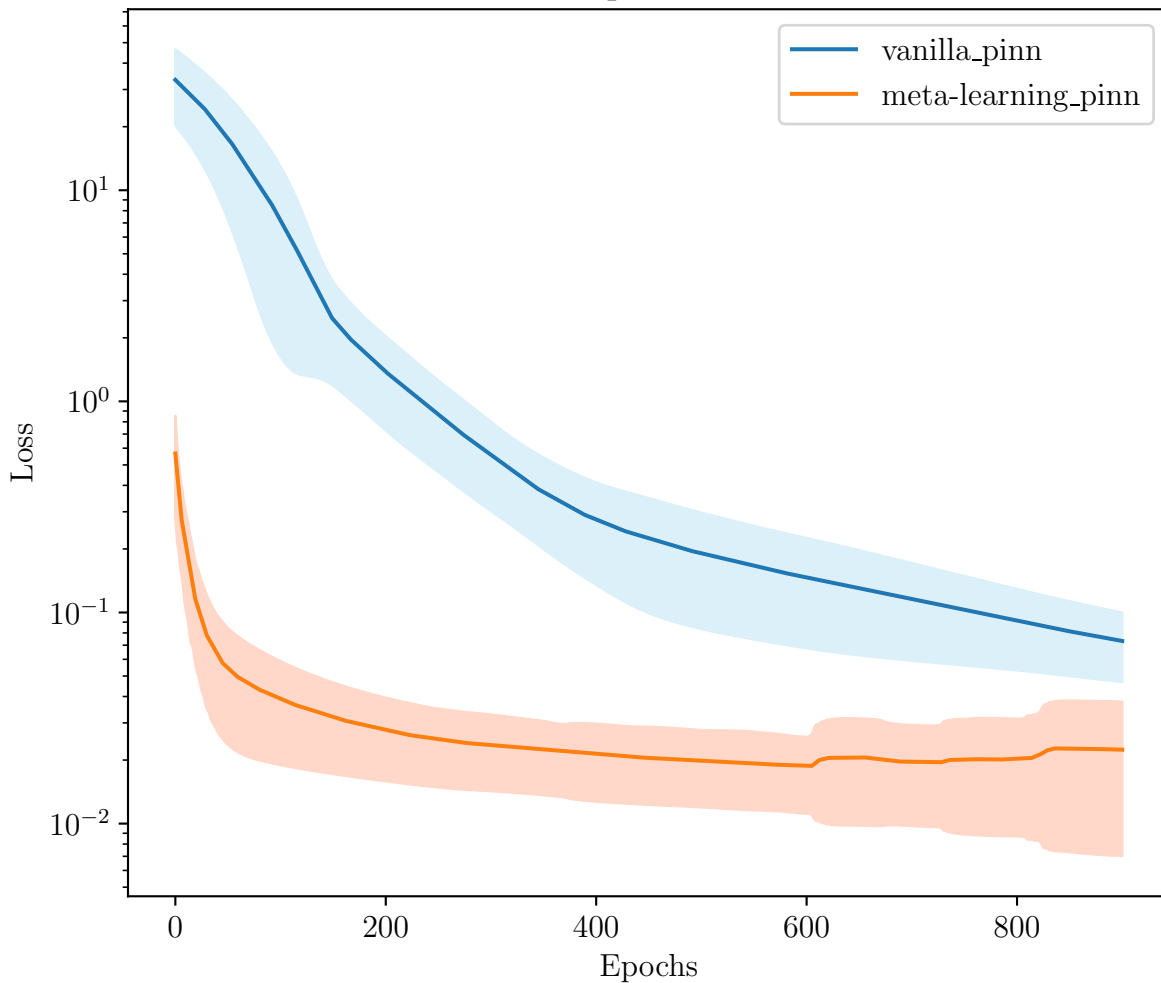

Supplement: supplementary_material [file attachment]

# Comparison of Model Adaptation

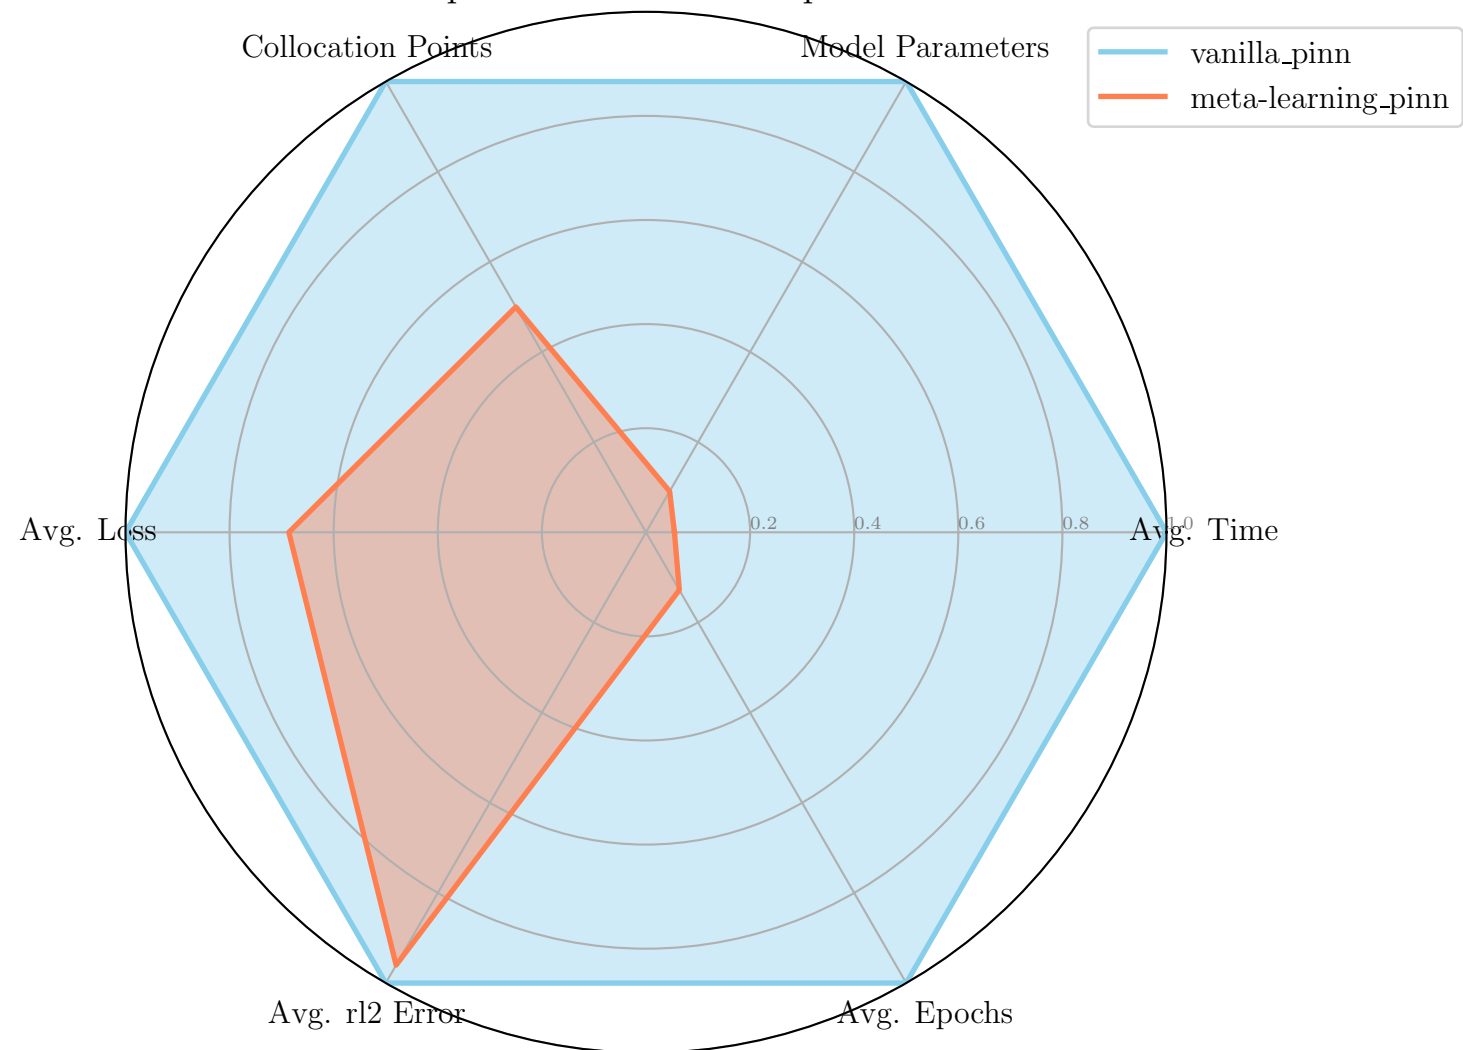

Supplement: supplementary_material [file attachment]
